# Supplementary material
Source: HighWire-hosted journal article supplement (http://qshc.bmj.com/highwire/filestream/147081/field_highwire_adjunct_files/1/162116appendix2.pdf)
Supplement: 162116appendix2.pdf [file 162116appendix2.pdf]

## Medication Errors in Pediatric Care

### Abstraction Form

Article ID: \_\_\_\_\_

Reviewer A: \_\_\_\_\_

Reviewer B: \_\_\_\_\_

Data Entry: \_\_\_\_\_

#### Do not include article in review because (check one):

- F does not include human data
- F published prior to 2000
- F not in English
- F meeting abstract (no full article for review)
- F no original data
- F case report only
- F does not include children or infants
- F does not provide pediatric data separate
- F does not include medication errors
- F addresses misdiagnosis only
- F addresses strategies to reduce errors only
- F does not address any of the questions
- F other: (specify) \_\_\_\_\_

*Do not continue if any item above is checked.*

**FOR EACH QUESTION, CHECK AS MANY BOXES AS APPLY**

|                  |                                       |  |
|------------------|---------------------------------------|--|
| 1. Type of study | Cohort                                |  |
|                  | Retrospective review with controls    |  |
|                  | Retrospective review without controls |  |
|                  | Interventional 'before/after' study   |  |
|                  | Incident report/case series review    |  |
|                  | RCT                                   |  |
|                  | Other _____                           |  |
| Unable to tell   |                                       |  |

|                                                     |     |  |
|-----------------------------------------------------|-----|--|
| 2. Was this 'pre' data for an interventional study? | Yes |  |
|                                                     | No  |  |

|                      |                     |  |
|----------------------|---------------------|--|
| 3. Location of Study | U.S.                |  |
|                      | Other North America |  |
|                      | Europe              |  |
|                      | Africa              |  |
|                      | Asia                |  |
|                      | Australia           |  |
|                      | South America       |  |
|                      | Unable to tell      |  |

|                                        |               |  |
|----------------------------------------|---------------|--|
| 4. # of institutions/entities in study | One           |  |
|                                        | More than one |  |

|                             |                                 |  |
|-----------------------------|---------------------------------|--|
| 5. Dates of data collection | Start date _____                |  |
|                             | End date _____                  |  |
|                             | Study had multiple time periods |  |
|                             | Time Period _____               |  |
|                             | Unclear                         |  |

|                |                   |  |
|----------------|-------------------|--|
| 6. Setting     | Inpatient         |  |
|                | ICU patients only |  |
|                | Clinic/outpatient |  |
|                | Emergency Dept    |  |
|                | Mix               |  |
|                | Other _____       |  |
| Unable to tell |                   |  |

|                                 |                             |  |
|---------------------------------|-----------------------------|--|
| 7. Special Clinical Population? | No, all populations studied |  |
|                                 | Oncology                    |  |
|                                 | Other _____                 |  |
|                                 | Unable to tell              |  |

|                |                         |  |
|----------------|-------------------------|--|
| 8. Patient Age | Infants (0-1 years)     |  |
|                | Children (1-11 years)   |  |
|                | Adolescents (12+ years) |  |
|                | Unable to tell          |  |

|                                |                                    |  |
|--------------------------------|------------------------------------|--|
| 9. Type of Medications Studied | One specific drug/drug class _____ |  |
|                                | All types of medications           |  |
|                                | Chemotherapy only                  |  |
|                                | IV mixtures only                   |  |
|                                | Other _____                        |  |

|                            |                     |  |
|----------------------------|---------------------|--|
| 10. Type of Numerator Data | Adverse drug events |  |
|                            | Medication Errors   |  |
|                            | Other _____         |  |

|                              |                                  |  |
|------------------------------|----------------------------------|--|
| 11. Type of Denominator Data | Error reports (manual)           |  |
|                              | Error reports (computerized)     |  |
|                              | Medication orders (manual)       |  |
|                              | Medication orders (computerized) |  |
|                              | Prescriptions (manual)           |  |
|                              | Prescriptions (computerized)     |  |
|                              | Patient Days                     |  |
|                              | Admissions                       |  |
|                              | Time Period _____                |  |
| Other _____                  |                                  |  |

|                            |                        |  |
|----------------------------|------------------------|--|
| 12. How was data obtained? | Chart reviews          |  |
|                            | Administrative data    |  |
|                            | Direct observations    |  |
|                            | Incident/error reports |  |
|                            | Other _____            |  |
|                            | Unable to tell         |  |

|                             |                |  |
|-----------------------------|----------------|--|
| 13. Who collected the data? | Physicians     |  |
|                             | Nurses         |  |
|                             | Pharmacists    |  |
|                             | Unable to tell |  |
|                             | Other _____    |  |

|                            |                |  |
|----------------------------|----------------|--|
| 14. Who verified the data? | Physicians     |  |
|                            | Nurses         |  |
|                            | Pharmacists    |  |
|                            | Unable to tell |  |
|                            | Other _____    |  |

|                               |                                |  |
|-------------------------------|--------------------------------|--|
| 15. Types of Errors collected | All types were lumped together |  |
|                               | Prescribing                    |  |
|                               | Dispensing                     |  |
|                               | Administering                  |  |
|                               | Monitoring Patient for Effect  |  |
|                               | MAR/documentation              |  |
|                               | Unable to tell                 |  |

|                     |                    |
|---------------------|--------------------|
| 16. Overall Results | Numerator Number   |
|                     | Denominator Number |
|                     | Other              |

|                     |                    |
|---------------------|--------------------|
| 17. Overall Results | Numerator Number   |
|                     | Denominator Number |
|                     | Other              |

|                     |                    |
|---------------------|--------------------|
| 18. Overall Results | Numerator Number   |
|                     | Denominator Number |
|                     | Other              |

|                     |                    |
|---------------------|--------------------|
| 19. Overall Results | Numerator Number   |
|                     | Denominator Number |
|                     | Other              |

|                     |                    |
|---------------------|--------------------|
| 20. Overall Results | Numerator Number   |
|                     | Denominator Number |
|                     | Other              |

|                               |                    |
|-------------------------------|--------------------|
| 21. Prescribing Error Results | Numerator Number   |
|                               | Denominator Number |
|                               | Other              |

---

|                              |                    |
|------------------------------|--------------------|
| 22. Dispensing Error Results | Numerator Number   |
|                              | Denominator Number |
|                              | Other              |

|                                 |                    |
|---------------------------------|--------------------|
| 23. Administering Error Results | Numerator Number   |
|                                 | Denominator Number |
|                                 | Other              |

|                                     |                    |
|-------------------------------------|--------------------|
| 24. MAR/Documentation Error Results | Numerator Number   |
|                                     | Denominator Number |
|                                     | Other              |

|                                                 |                    |
|-------------------------------------------------|--------------------|
| 25. Monitoring Patient for Effect Error Results | Numerator Number   |
|                                                 | Denominator Number |
|                                                 | Other              |

|                                    |     |  |
|------------------------------------|-----|--|
| 26. Is severity of error assessed? | Yes |  |
|                                    | No  |  |

|                                            |  |
|--------------------------------------------|--|
| 27. # of categories of severity scale used |  |
|--------------------------------------------|--|

|                                                 |                    |
|-------------------------------------------------|--------------------|
| 28. For errors that 'did not reach the patient' | Numerator Number   |
|                                                 | Denominator Number |
|                                                 | Other              |

|                                      |                    |
|--------------------------------------|--------------------|
| 29. For errors that caused 'no harm' | Numerator Number   |
|                                      | Denominator Number |
|                                      | Other              |

---

|                                 |                    |  |
|---------------------------------|--------------------|--|
| 30. For errors that caused harm | Numerator Number   |  |
|                                 | Denominator Number |  |
|                                 | Other              |  |

|                                                               |                    |  |
|---------------------------------------------------------------|--------------------|--|
| 31. For errors that caused significant morbidity or mortality | Numerator Number   |  |
|                                                               | Denominator Number |  |
|                                                               | Other              |  |

|                                  |     |  |
|----------------------------------|-----|--|
| 32. Is there specific cost data? | Yes |  |
|                                  | No  |  |

|                                                         |     |  |
|---------------------------------------------------------|-----|--|
| 33. Is there general cost extrapolations in Discussion? | Yes |  |
|                                                         | No  |  |

Comments:
